# Supplementary material
Source: PubMed Central journal article supplement (PMC2808230)

Supplemental Figure 1: Distribution of GFP::GBDwsp-1 fluorescent lifetimes in embryos expressing either GFP::GBDwsp-1 alone or co-expressed with either mCHERRY::CDC-42(T17N) or mCHERRY::CDC-42(Q61L)

The fluorescence lifetime of GFP::GBDwsp-1 (expressed from one genetic copy; GFP-only cross products) was statistically indistinguishable in embryos expressing GFP::GBDwsp-1 alone (GFP only cross products) vs coexpressed with mCHERRY::CDC-42(T17N) (WH432xWH517,  $p>0.8$ ), but was significantly shortened when coexpressed with CDC-42(Q61L) (WH423xWH517,  $p<0.01$ ) and was significantly lengthened when expressed from 2x genetic dose (WH517 GFP only,  $p<0.02$ ).

Supplemental Figure 2: Localization of GFP-tagged CDC-42 and two of its mutant forms

Timeseries of the localization of GFP-fusions of CDC-42, the constitutively inactive mutant T17N and the constitutively active mutant Q61L in embryos from polarization to 2-cell stage. Arrowheads indicate polarized enrichment of cortical signal. Scale bar is 10 $\mu$ m.

Supplemental Figure 3: Localization of GFP-tagged CGEF-1A

Timeseries of the localization of a GFP-fused CGEF-1A. There is enrichment of the nucleoplasm and a subtle enrichment at the cortex in Phase II. Scale bar is 10 $\mu$ m.

Supplemental Figure 4: Observed maximum speeds of GFP::NMY-2-labeled cortical regions during Phase I

The flow rates of five of the fastest moving GFP::NMY-2 puncta were measured from kymographs of timeseries collected from embryos of the described genotype. Error bars represent the observed SEM and are absent in conditions with a single usable embryo. “\*” indicates that the measured speeds were statistically significantly different from those of the wild type at  $p<0.05$ .

Supplemental Figure 5: RHO-1 and CDC-42 pathway components are required to recruit GFP::NMY-2 to the cortex in distinct phases

Embryos expressing GFP::NMY-2 in the early embryo. In the wild type, GFP::NMY-2 localizes to the cortex in distinct morphological distributions in Phases I and II. The robust myosin foci observed in Phase I depend upon ECT-2, RHO-1 and LET-502. The robust, diffuse, polar distribution of smaller myosin puncta in Phase II depends upon CGEF-1, CDC-42 and MRCK-1. Disruption of either pathway does not abolish the recruitment by the other, and disruption of both pathways disrupts both recruitment patterns. Double disruptions tested include *mrck-1(ok586); let-502(frNAi)*, *mrck-1(ok586); ect-2(frNAi)*, *cdc-42(frNAi); let-502(frNAi)*, *cdc-42(frNAi); rho-1(frNAi)*, *cdc-42(frNAi); ect-2(frNAi)*, *ect-2(frNAi); cgef-1(gk261)*; *let-502(frNAi); cgef-1(gk261)*; *rho-1(frNAi)*, and *cgef-1(gk261); ect-2(frNAi)*. All these double disrupted embryos exhibited defects in both Phase I and Phase II cortical myosin recruitment. *mrck-1(ok586)* embryos exhibited more severe phenotypes than did *mrck-1(frNAi)* embryos. The images from Figure 6 are duplicated here for completeness. Scale bar is 10 $\mu$ m.

Movie 1: Time-lapse movie of GFP::GBDwsp-1 expressed in a *control(frNAi)* embryo. Movie plays at 60x real time.

Movie 2: Time-lapse movie of GFP::GBDwsp-1 expressed in a *cdc-42(frNAi)* embryo. Movie plays at 60x real time.

Movie 3: Time-lapse movie of GFP::GBDwsp-1 expressed in a *spd-5(frNAi)* embryo. Movie plays at 60x real time.

Movie 4: Time-lapse movie of GFP::GBDwsp-1 expressed in a *par-2(frNAi)* embryo. Movie plays at 60x real time.

Movie 5: Time-lapse movie of GFP::GBDwsp-1 expressed in a *par-6(zu222)* embryo. Movie plays at 60x real time.

Movie 6: Time-lapse movie of GFP::GBDwsp-1 expressed in an embryo coexpressing CDC-42(Q61L). Movie plays at 60x real time.

Movie 7: Time-lapse movie of GFP::GBDwsp-1 expressed in a *cgef-1(gk261)* embryo. Movie plays at 60x real time.

Movie 8: Time-lapse movie of GFP::GBDwsp-1 expressed in a *chin-1(tm1909)* embryo. Movie plays at 60x real time.

Movie 9: Time-lapse movie of GFP::PAR-6 expressed in a no-RNAi control embryo. Movie plays at 60x real time.

Movie 10: Time-lapse movie of GFP::PAR-6 expressed in a *cgef-1(gk261)* embryo. Movie plays at 60x real time.

Movie 11: Time-lapse movie of GFP::PAR-2 expressed in a no-RNAi control embryo. Movie plays at 60x real time.

Movie 12: Time-lapse movie of GFP::PAR-2 expressed in a *cgef-1(gk261)* embryo. Movie plays at 60x real time.

Movie 13: Time-lapse movie of GFP::CHIN-1 expressed in a no-RNAi control embryo. Movie plays at 60x real time.

Movie 14: Time-lapse movie of GFP::CHIN-1 expressed in a *cdc-42(frNAi)* embryo. Movie plays at 60x real time.

Movie 15: Time-lapse movie of GFP::CHIN-1 expressed in a *par-6(frNAi)* embryo. Movie plays at 60x real time.

Movie 16: Time-lapse movie of GFP::CHIN-1 expressed in a *par-2(frNAi)* embryo. Movie plays at 60x real time.

Movie 17: Time-lapse movie of GFP::CHIN-1 expressed in a *par-1(frNAi)* embryo. Movie plays at 60x real time.

Movie 18: Time-lapse movie of GFP::NMY-2 expressed in a no-RNAi control embryo. Movie plays at 60x real time.

Movie 19: Time-lapse movie of GFP::NMY-2 expressed in a *cgef-1(gk261)* embryo. Movie plays at 60x real time.

Movie 20: Time-lapse movie of GFP::NMY-2 expressed in a *cdc-42(frNAi)* embryo. Movie plays at 60x real time.

Movie 21: Time-lapse movie of GFP::NMY-2 expressed in a *mrck-1(ok586)* embryo. Movie plays at 60x real time.

Movie 22: Time-lapse movie of GFP::NMY-2 expressed in an *ect-2(frNAi)* embryo. Movie plays at 60x real time.

Movie 23: Time-lapse movie of GFP::NMY-2 expressed in a *rho-1(frNAi)* embryo. Movie plays at 60x real time.

Movie 24: Time-lapse movie of GFP::NMY-2 expressed in a *let-502(frNAi)* embryo. Movie plays at 60x real time.

Movie 25: Time-lapse movie of GFP::NMY-2 expressed in a *cdc-42(frNAi); ect-2(frNAi)* embryo. Movie plays at 60x real time.

Supplemental Movie 1: Time-lapse movie of GFP::CDC-42 expressed in a no-RNAi embryo. Movie plays at approximately 60x real time.

Supplemental Movie 2: Time-lapse movie of GFP::CGEF-1A expressed in a no-RNAi embryo. Movie plays at 60x real time.

Supplemental Table 1: Putative *C. elegans* Rho-family-directed GAP- and GEF-encoding genes screened for mislocalization of GFP::*GBDwsp-1*

Genes predicted to encode proteins with RhoGEF domains

| Genetic Name     | Molecular Name | RNAi Target | Screen Result | Notes                                                             |
|------------------|----------------|-------------|---------------|-------------------------------------------------------------------|
| cgef-1 / tag-150 | C14A11.3       | both        | +             | HIT: RNAi embryos exhibit reduced loc at all phases               |
| ect-2            | T19E10.1       | genomic     | - other       | ECT2 (mammalian RhoGEF) homolog; RNAi embryos are hypocontractile |
| tag-77           | C28C12.10      | genomic     | -             |                                                                   |
| tag-52           | C02F12.4       | genomic     | -             |                                                                   |
| rhgf-2           | T08H4.1        | genomic     | -             | RHo Guanine nucleotide exchange Factor                            |
| C11D9.1          | C11D9.1        | genomic     | -             |                                                                   |
| uig-1            | F32F2.1        | genomic     | -             | Unc-112-Interacting Guanine nucleotide exchange factor            |
| unc-73           | F55C7.7        | genomic     | -             | UNCoordinated                                                     |
| tag-218          | K07D4.7        | genomic     | -             |                                                                   |
| Y105E8A.24       | Y105E8A.24     | cdNA        | -             |                                                                   |
| unc-89           | C09D1.1        | genomic     | -             | UNCoordinated                                                     |
| exc-5            | C33D9.1        | genomic     | -             | EXcretory canal abnormal                                          |
| R02F2.2          | R02F2.2        | genomic     | -             |                                                                   |
| Y95B8A.12        | Y95B8A.12      | cdNA        | -             |                                                                   |
| gei-18           | Y37A1B.15      | genomic     | -             | GEX Interacting protein                                           |
| sos-1            | T28F12.3       | genomic     | -             | Drosophila SOS homolog                                            |
| rhgf-1           | F13E6.6        | cdNA        | -             | RHo Guanine nucleotide exchange Factor                            |
| pix-1            | K11E4.4        | ---         | no result     | PIX Interacting eXchange factor) homolog; no construct for RNAi   |

Genes predicted to encode proteins with RhoGAP domains

| Gene Name            | Molec Name  | construct | Notes   |                                                              |
|----------------------|-------------|-----------|---------|--------------------------------------------------------------|
| chin-1 / BE0003N10.2 | BE0003N10.2 | cdNA      | +       | HIT: RNAi embryos exhibit abnormal PII and PIII probe loc    |
| cyk-4                | K08E3.6     | genomic   | - other | CYtoKinesis defect; RNAi embryos fail cytokinesis            |
| rga-3                | K09H11.3    | genomic   | - other | Rho GTPase Activating protein; RNAi embryos hypercontractile |
| rga-1                | W02B12.8    | genomic   | -       | Rho GTPase Activating protein                                |

|          |           |         |   |                                                          |
|----------|-----------|---------|---|----------------------------------------------------------|
| F23H11.4 | F23H11.4  | genomic | - | OCRL (Lowe's oculocerebrorenal syndrome protein)         |
| ocr1-1   | C16C2.3   | genomic | - | homolog                                                  |
| srgp-1   | F12F6.5   | genomic | - | Slit-Robo GAP homolog                                    |
| rga-2    | Y53C10A.4 | genomic | - | Rho GTPase Activating protein                            |
| hum-7    | F56A6.2   | genomic | - | Heavy chain, Unconventional Myosin                       |
| rlbp-1   | T23G11.5  | genomic | - | RaL Binding Protein                                      |
| Y34B4A.8 | Y34B4A.8  | cdna    | - |                                                          |
| C01F4.2  | C01F4.2   | genomic | - |                                                          |
| gei-1    | F45H7.2   | genomic | - |                                                          |
| rga-4    | Y75B7AL.4 | cdna    | - | Rho GTPase Activating protein                            |
| T04C9.1  | T04C9.1   | genomic | - |                                                          |
| tag-341  | ZK669.1   | genomic | - |                                                          |
| 2RSSE.1  | 2RSSE.1   | cdna    | - |                                                          |
| pac-1    | C04D8.1   | genomic | - | PAR-6 At Contacts (abnormal early localization of PAR-6) |
| syd-1    | F35D2.5   | genomic | - | SYnapse Defective                                        |
| tag-325  | C38D4.5   | genomic | - |                                                          |
| rrc-1    | F47A4.3   | genomic | - | RhoGAP for Rac-1 and Cdc-42                              |
| H08M01.2 | H08M01.2  | genomic | - |                                                          |

Supplemental Table 2: Genetic interactions of *candidate GEF(RNAi)* with *cgef-1(gk261)*

|                   | Brood size (N2) | Brood size (WH514) | Embryonic Survival (N2) | +/- SEM | Embryonic Survival (WH514) | +/- SEM | p-value for RNAi alone | p-value for interaction |
|-------------------|-----------------|--------------------|-------------------------|---------|----------------------------|---------|------------------------|-------------------------|
| none              | 211             | 226                | 99.6%                   | 0.4%    | 98.8%                      | 0.7%    |                        |                         |
| <i>tag-52</i>     | 274             | 175                | 99.6%                   | 0.4%    | 89.7%                      | 2.3%    |                        |                         |
| <i>tag-127</i>    | 236             | 170                | 100.0%                  | 0.0%    | 67.0%                      | 3.6%    | *                      | *                       |
| <i>C11D9.1</i>    | 354             | 234                | 99.7%                   | 0.3%    | 86.3%                      | 2.2%    |                        | 0.015                   |
| <i>uig-1</i>      | 211             | 307                | 100.0%                  | 0.0%    | 98.0%                      | 0.8%    | *                      | *                       |
| <i>unc-73</i>     | 227             | 270                | 99.6%                   | 0.4%    | 96.7%                      | 1.1%    |                        |                         |
| <i>tag-218</i>    | 311             | 235                | 99.0%                   | 0.6%    | 98.3%                      | 0.8%    |                        |                         |
| <i>Y105E8A.24</i> | 185             | 200                | 98.9%                   | 0.8%    | 91.5%                      | 2.0%    |                        |                         |
| <i>unc-89</i>     | 240             | 257                | 99.2%                   | 0.6%    | 98.8%                      | 0.7%    |                        |                         |
| <i>exc-5</i>      | 262             | 255                | 98.5%                   | 0.8%    | 99.2%                      | 0.6%    | 0.048                  |                         |
| <i>R02F2.2</i>    | 93              | 164                | 95.7%                   | 2.1%    | 66.4%                      | 3.7%    | 0.001                  |                         |
| <i>Y95B8A.12</i>  | 247             | 222                | 98.4%                   | 0.8%    | 87.8%                      | 2.2%    | 0.040                  |                         |
| <i>gei-18</i>     | 315             | 171                | 98.4%                   | 0.7%    | 96.5%                      | 1.4%    | 0.032                  |                         |
| <i>sos-1</i>      | 319             | 237                | 97.5%                   | 0.9%    | 96.6%                      | 1.2%    | 0.002                  |                         |
| <i>rhgf-1</i>     | 265             | 253                | 97.4%                   | 1.0%    | 99.2%                      | 0.6%    | 0.002                  | 0.014                   |
| <i>tag-77</i>     | 326             | 181                | 98.2%                   | 0.7%    | 94.5%                      | 1.7%    | 0.014                  |                         |

Brood size and embryonic survival from N2[*wild-type*] or WH514[*cgef-1(gk261)*] animals either untreated or treated with fRNAi directed at the indicated gene. Effects on embryonic survival of the depletion condition and of the interaction of the depletion condition with the *cgef-1(gk261)* genotype were investigated by logistic regression analysis. If statistically significant, the p-values of either parameter are presented above. Asterisks indicate that the p-value is uninformative due to the absence of observed dead embryos in the depletions of wild-type embryos of those conditions. Each tested condition was represented by at least two worms.

**Supplemental Figure 1**

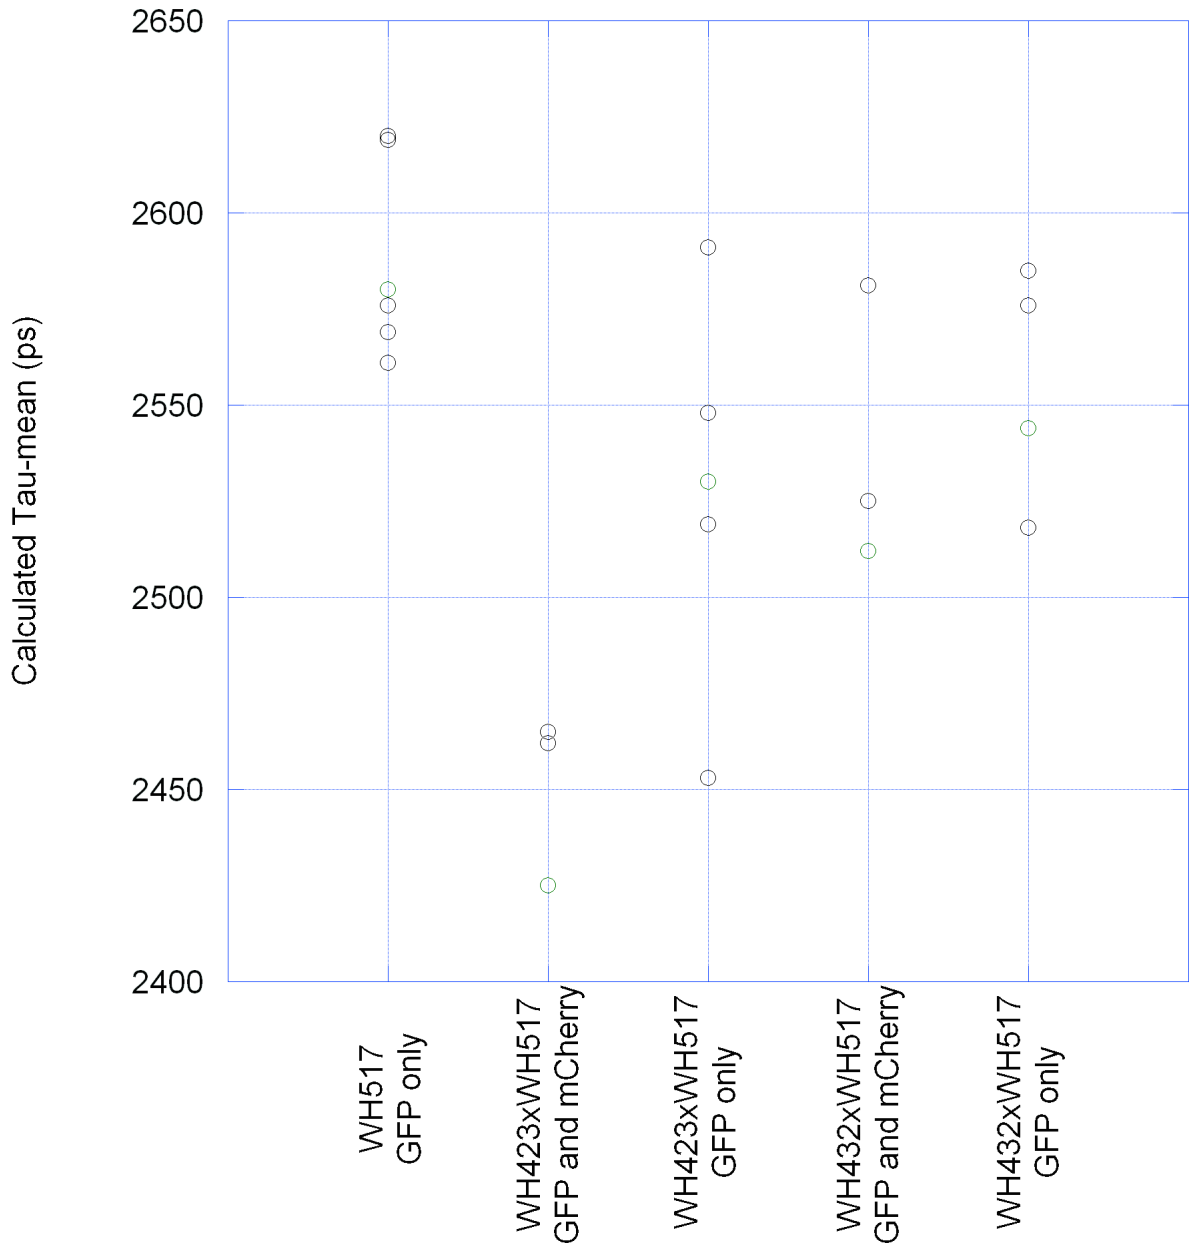

**Supplemental Figure 2**

GFP::CDC-42

GFP::CDC-42(T17N)

GFP::CDC-42(Q61L)

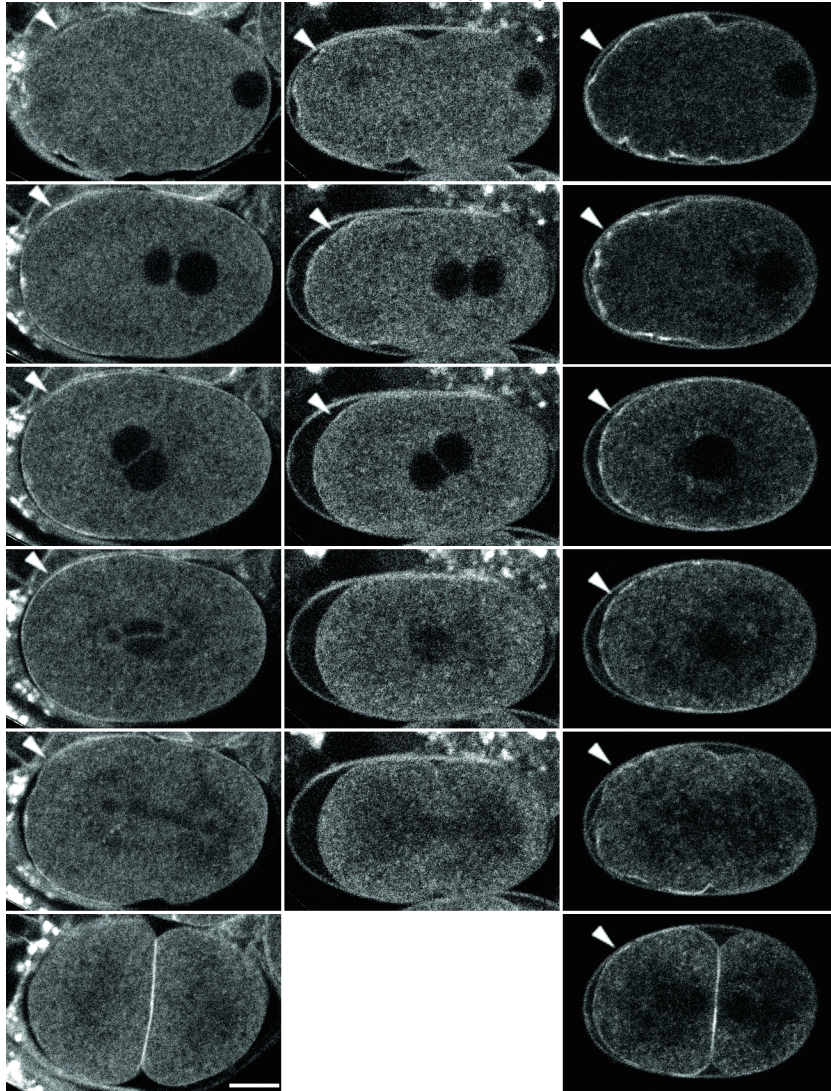



**Supplemental Figure 3**

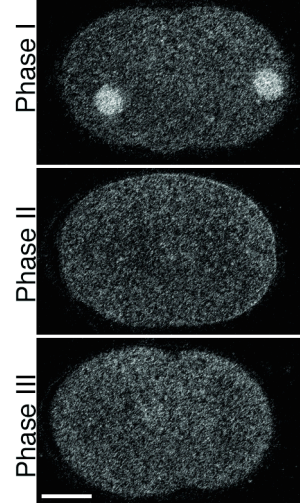

**Supplemental Figure 4**  
**Observed maximum speeds of GFP::NMY-2-labeled**  
**cortical regions during phase I**

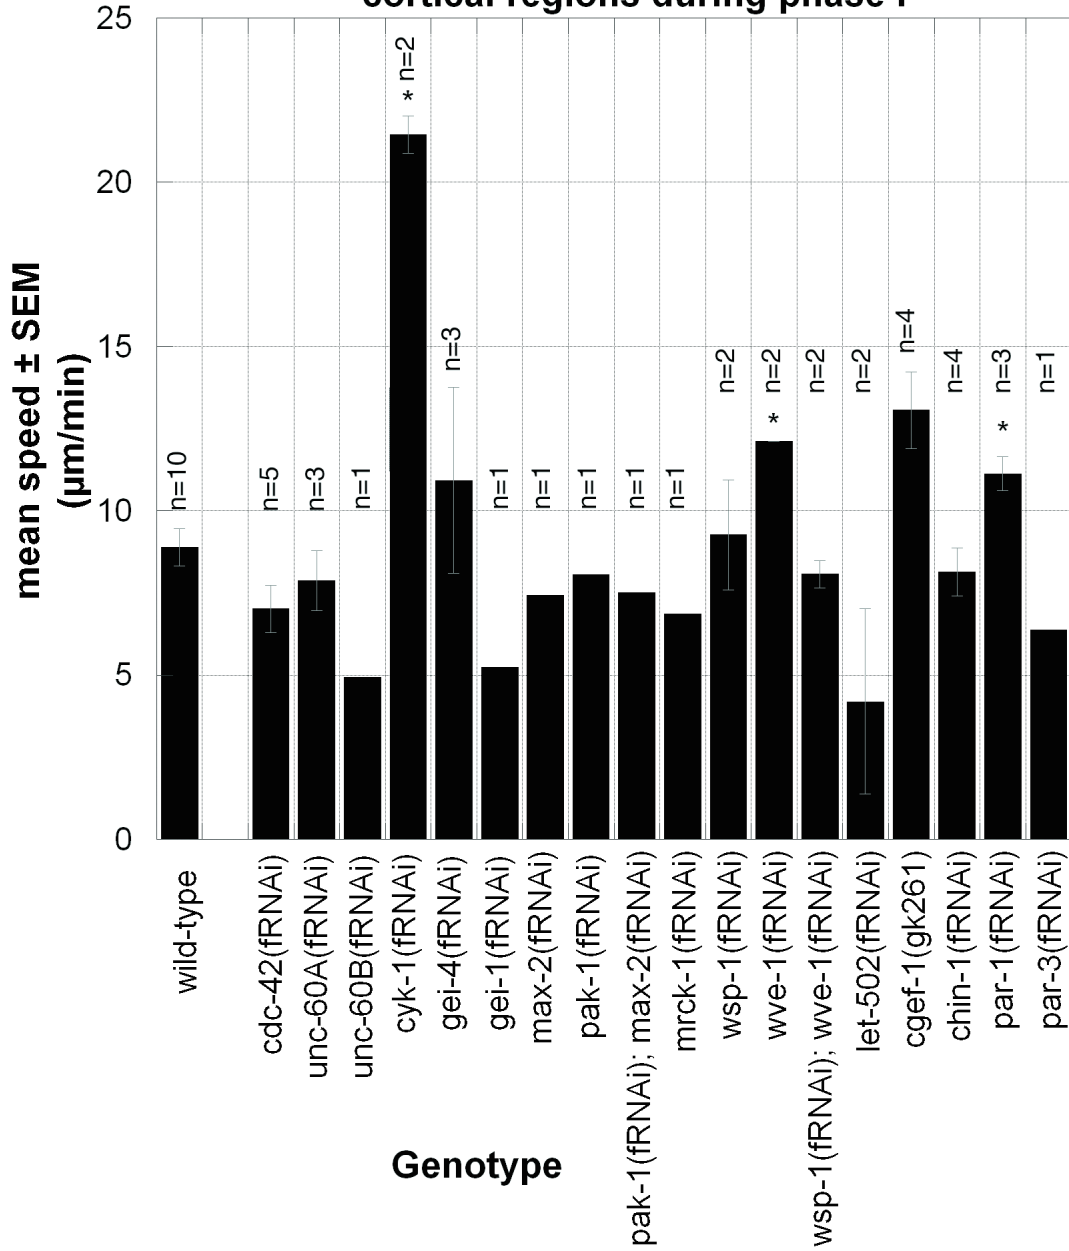

# Supplemental Figure 5

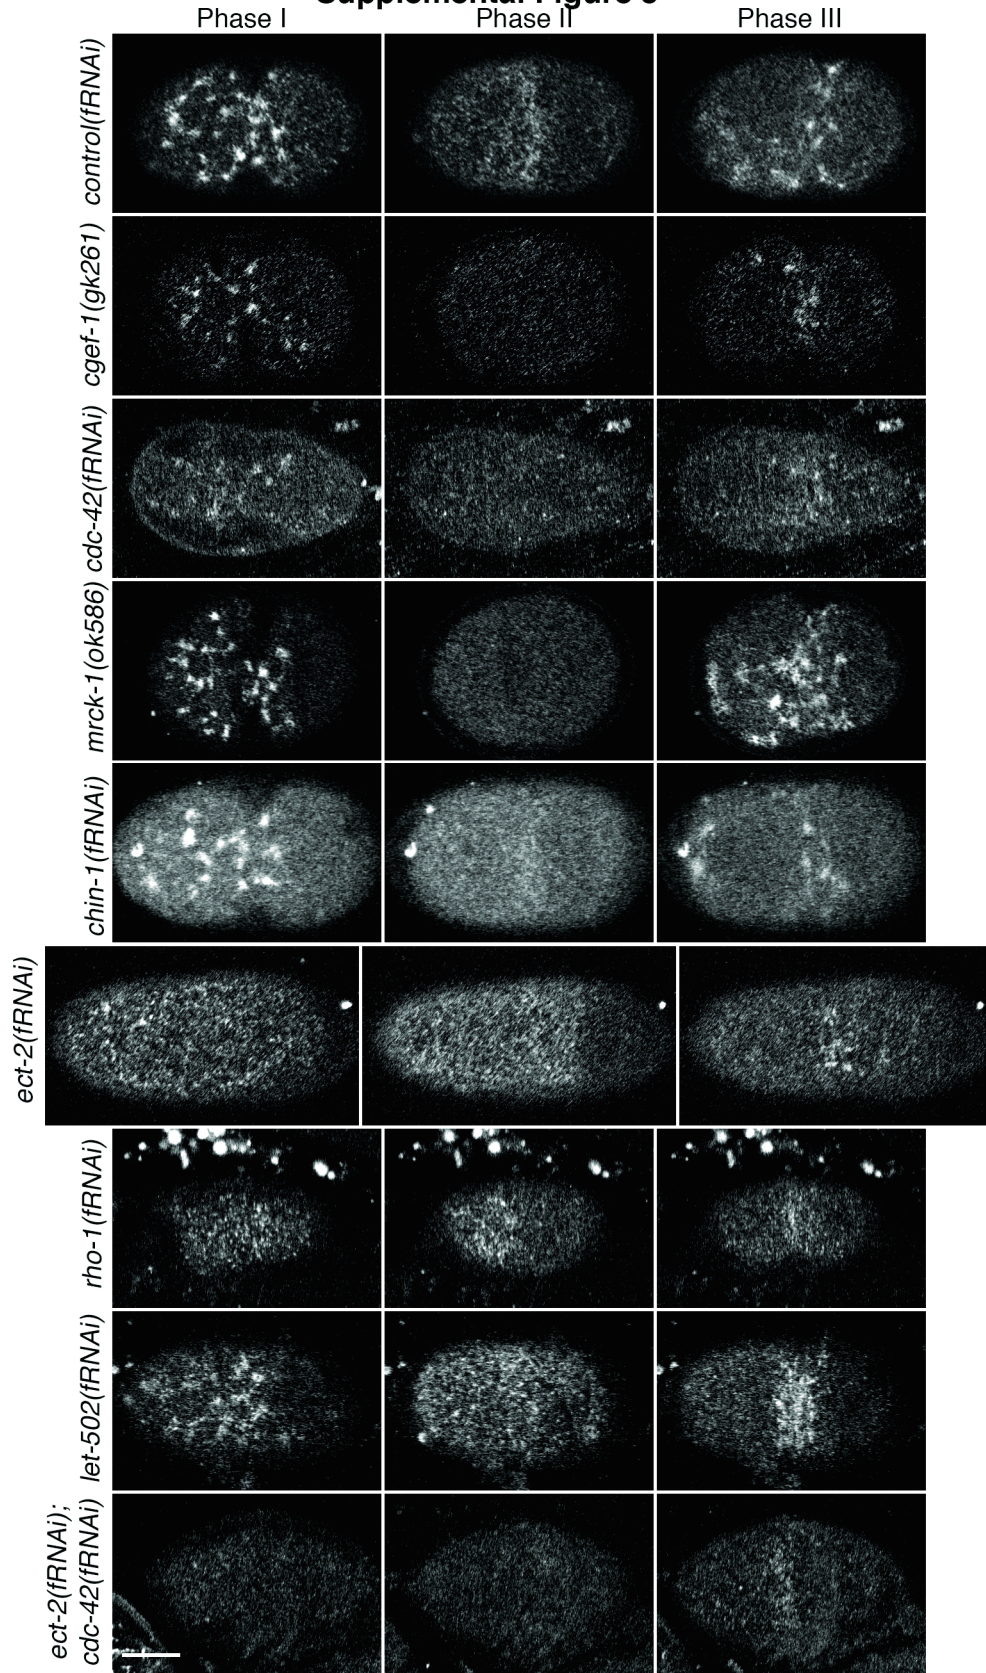

Supplement: E09-01-0060_1.pdf [file E09-01-0060_1.pdf]
